# Supplementary material
Source: HighWire-hosted journal article supplement (https://bmjopen.bmj.com/content/15/1/e092312)
Supplement: inline-supplementary-material-1 [file inline-supplementary-material-1.pdf]

**Study Title:** Protocol for an Analytical Cross-Sectional Study on the Association of Iron Deficiency Anemia with Dental Caries in the Permanent First Molars of Children Aged 7 to 12 Years in Karachi, Pakistan

**Instructions:**

- 1. Separate form should be filled for each subject.
- 2. This form should only be filled after the subject has been screened successfully and has been considered eligible for the study.

Child ID: \_\_\_\_\_  
Version number and Date: \_\_ ( \_ / \_ / \_ \_ )

**Section A: Socio-demographic information**

*(asked from the legal guardian)*

| S. No | Question                                    | Code                                                                                                       | Skip                                      | Response               |
|-------|---------------------------------------------|------------------------------------------------------------------------------------------------------------|-------------------------------------------|------------------------|
| 1.    | Gender of child?                            | 1. Female<br>2. Male                                                                                       |                                           |                        |
| 2.    | What is the age of child?                   | Write exact age in years                                                                                   |                                           | <div>__ __ Years</div> |
| 3 a.  | Has the child ever attended school?         | 1. Yes<br>2. No<br>9. I don't know                                                                         | If "No" or "I don't know" then go to Q4a. |                        |
| 3 b.  | What is the education status of your child? | 1. No formal schooling<br>2. Schooling<br>2.1 if schooling= please specify Grade _____<br>9. I don't know  |                                           |                        |
| 4 a.  | Has the mother ever attended school?        | 1. Yes<br>2. No<br>9. I don't know                                                                         | If "No" or "I don't know" then go to Q5 a |                        |
| 4 b.  | What is the mother's education status?      | 1. No formal schooling<br>2. Primary school education<br>3. Middle school education<br>4. Secondary school |                                           |                        |

|      |                                                                                                   |                                                                                                                                                                                                                               |                                          |  |
|------|---------------------------------------------------------------------------------------------------|-------------------------------------------------------------------------------------------------------------------------------------------------------------------------------------------------------------------------------|------------------------------------------|--|
|      |                                                                                                   | education<br>5. Higher secondary school education<br>6. Above higher secondary school education<br>9. I don't know                                                                                                            |                                          |  |
| 5 a. | Has the father ever attended school?                                                              | 1. Yes<br>2. No<br>9. I don't know                                                                                                                                                                                            | If "No" or "I don't know" then go to Q6. |  |
| 5 b. | What is the father's education status?                                                            | 1. No formal schooling<br>2. Primary school education<br>3. Middle school education<br>4. Secondary school education<br>5. Higher secondary school education<br>6. Above higher secondary school education<br>9. I don't know |                                          |  |
| 6.   | What is the usual monthly household expenditure on food items?                                    | Write the exact amount in PKR '98' is I don't remember                                                                                                                                                                        |                                          |  |
| 7.   | What is the usual monthly household expenditure on utilities such as gas, water and electricity?  | Write the exact amount in PKR '98' is I don't remember                                                                                                                                                                        |                                          |  |
| 8.   | What is the usual monthly household medical expenditure?                                          | Write the exact amount in PKR '98' is I don't remember                                                                                                                                                                        |                                          |  |
| 9.   | What is the usual monthly household expenditure on clothing items?                                | Write the exact amount in PKR '98' is I don't remember                                                                                                                                                                        |                                          |  |
| 10.  | What is the usual monthly household expenditure on social activities such as gifts, parties etc.? | Write the exact amount in PKR '98' is I don't remember                                                                                                                                                                        |                                          |  |
| 11.  | What is the usual monthly household expenditure on miscellaneous items?                           | Write the exact amount in PKR '98' is I don't remember                                                                                                                                                                        |                                          |  |

**Section B: Medical history***(taken from the legal guardian)*

| S. No | Question                                                                                                                  | Code                                                     | Skip                                           | Response |
|-------|---------------------------------------------------------------------------------------------------------------------------|----------------------------------------------------------|------------------------------------------------|----------|
| 12 a. | Has the child ever been diagnosed with iron deficiency anemia from the age of 6 by a healthcare professional?             | 1. Yes<br>2. No<br>9. I don't know                       | If 'No' or 'I don't know', skip to S. No 13 a. |          |
| 12 b. | How many times have your child been diagnosed with iron deficiency anemia from the age of 6 by a healthcare professional? | Write the exact number of times '98' is I don't remember |                                                |          |

**Section C: Oral hygiene-related behavior***(taken from the child)*

| S.No  | Question                                           | Code                                                                                                                                                                                | Skip                                           | Response |
|-------|----------------------------------------------------|-------------------------------------------------------------------------------------------------------------------------------------------------------------------------------------|------------------------------------------------|----------|
| 13 a. | When was the last time you went to the dentist?    | 1. Never<br>2. >1 year ago<br>3. Between 6 months and a year ago<br>4. <6 months ago<br>9. I don't know                                                                             | If 'Never' skip to S. No 14                    |          |
| 13 b. | What was the reason for your visit to the dentist? | 1. Pain or trouble with teeth, gums or mouth<br>2. Treatment/Follow-up treatment<br>3. Routine check-up of teeth<br>4. Other reasons<br>Please specify:<br>_____<br>9. I don't know |                                                |          |
| 14.   | How frequently do you brush your teeth?            | 1. Never<br>2. 2-3 times a month<br>3. Once a week<br>4. 2-6 times a week<br>5. Once a day<br>6. $\geq 2$ times a day                                                               | If 'Never' or 'I don't know' skip to S. No 16. |          |

|       |                                                                                    |                                                                                                                                                                                                                                                                                                                                                                                                                                                          |                                             |  |
|-------|------------------------------------------------------------------------------------|----------------------------------------------------------------------------------------------------------------------------------------------------------------------------------------------------------------------------------------------------------------------------------------------------------------------------------------------------------------------------------------------------------------------------------------------------------|---------------------------------------------|--|
|       |                                                                                    | 9. I don't know                                                                                                                                                                                                                                                                                                                                                                                                                                          |                                             |  |
| 15 a. | Do you use a toothpaste?                                                           | 1. Yes<br>2. No<br>9. I don't know                                                                                                                                                                                                                                                                                                                                                                                                                       | If 'No' or 'I don't know', skip to S. No 16 |  |
| 15 b. | What toothpaste do you use to clean your teeth?                                    | Write the exact response.<br>'98' is I don't remember                                                                                                                                                                                                                                                                                                                                                                                                    |                                             |  |
| 16.   | Do you regularly use any of these other oral hygiene practices atleast once a day? | 1. Toothpowder<br>2. Mouthwash<br>3. Miswak<br>4. Dandaasa<br>5. All of the above<br>6. None of the above<br>7. Toothpowder and mouthwash<br>8. Toothpowder and miswak<br>9. Toothpowder and dandaasa<br>10. Mouthwash and miswak<br>11. Mouthwash and dandaasa<br>12. Miswak and dandasa<br>13. Toothpowder, mouthwash and miswak<br>14. Toothpowder, mouthwash and dandasa<br>15. Toothpowder, dandasa and miswak<br>16. Mouthwash, dandasa and miswak |                                             |  |

**Section D: Other habits**  
*(taken from the child)*

| S. No | Question                                                                                                                        | Code                                                                                                         | Skip | Response |
|-------|---------------------------------------------------------------------------------------------------------------------------------|--------------------------------------------------------------------------------------------------------------|------|----------|
| 17.   | How often do you use smokeless tobacco including snus, snuff, chewable tobacco (gutkha, betel leaf and/areca nut with tobacco)? | 1. Never<br>2. 2-3 times a month<br>3. Once a week<br>4. 2-6 times a week<br>5. Every day<br>9. I don't know |      |          |

### **Section E: Dietary information**

*(taken from the child)*

| S. No 18. How often have you consumed, on average, the following food items in the last six months? |                                         |                                |                            |                   |                                 |                                 |                  |                                |                                |                          |
|-----------------------------------------------------------------------------------------------------|-----------------------------------------|--------------------------------|----------------------------|-------------------|---------------------------------|---------------------------------|------------------|--------------------------------|--------------------------------|--------------------------|
| Items                                                                                               |                                         | Never/<br>< once<br>a<br>month | 1-3<br>times<br>a<br>month | Once<br>a<br>week | 2 to<br>4<br>times<br>a<br>week | 5 to<br>6<br>times<br>a<br>week | Once<br>a<br>day | 2 to<br>3<br>times<br>a<br>day | 4 to<br>5<br>times<br>a<br>day | 6 to 7<br>times<br>a day |
|                                                                                                     | <b><u>Bread and Cereals</u></b>         |                                |                            |                   |                                 |                                 |                  |                                |                                |                          |
| 1                                                                                                   | Porridge with sugar                     |                                |                            |                   |                                 |                                 |                  |                                |                                |                          |
| 2                                                                                                   | Frozen paratha/ Street food paratha     |                                |                            |                   |                                 |                                 |                  |                                |                                |                          |
| 3                                                                                                   | Homemade paratha (Refined Flour)        |                                |                            |                   |                                 |                                 |                  |                                |                                |                          |
| 4                                                                                                   | White bread/ Bun                        |                                |                            |                   |                                 |                                 |                  |                                |                                |                          |
| 5                                                                                                   | Rusk/ Cake Rusk                         |                                |                            |                   |                                 |                                 |                  |                                |                                |                          |
| 6                                                                                                   | Two-minute noodles/ Macaroni/ Spaghetti |                                |                            |                   |                                 |                                 |                  |                                |                                |                          |
| 7                                                                                                   | Biscuit / Cookie                        |                                |                            |                   |                                 |                                 |                  |                                |                                |                          |
| 8                                                                                                   | Sandwich biscuit                        |                                |                            |                   |                                 |                                 |                  |                                |                                |                          |
| 9                                                                                                   | Donut                                   |                                |                            |                   |                                 |                                 |                  |                                |                                |                          |
| 10                                                                                                  | Cupcake/Muffin/Plain Cake               |                                |                            |                   |                                 |                                 |                  |                                |                                |                          |
| 11                                                                                                  | Pizza                                   |                                |                            |                   |                                 |                                 |                  |                                |                                |                          |
|                                                                                                     | <b><u>Desserts</u></b>                  |                                |                            |                   |                                 |                                 |                  |                                |                                |                          |
| 12                                                                                                  | Kheer/ Custard/Pudding                  |                                |                            |                   |                                 |                                 |                  |                                |                                |                          |
| 13                                                                                                  | Cake/Pastry                             |                                |                            |                   |                                 |                                 |                  |                                |                                |                          |
| 14                                                                                                  | Meethai/halwa                           |                                |                            |                   |                                 |                                 |                  |                                |                                |                          |
| 15                                                                                                  | Sweetened yoghurt                       |                                |                            |                   |                                 |                                 |                  |                                |                                |                          |
| 16                                                                                                  | Ice cream                               |                                |                            |                   |                                 |                                 |                  |                                |                                |                          |

|    |                                         |  |  |  |  |  |  |  |  |  |
|----|-----------------------------------------|--|--|--|--|--|--|--|--|--|
| 17 | Plain Jelly                             |  |  |  |  |  |  |  |  |  |
| 18 | Fruit chaat (that has added sugar)      |  |  |  |  |  |  |  |  |  |
|    | <b><u>Beverages</u></b>                 |  |  |  |  |  |  |  |  |  |
| 19 | Tea with sugar                          |  |  |  |  |  |  |  |  |  |
| 20 | Sweet lassi (flavored or unflavored)    |  |  |  |  |  |  |  |  |  |
| 21 | Soft drink                              |  |  |  |  |  |  |  |  |  |
| 22 | Sharbat / Instant Drink                 |  |  |  |  |  |  |  |  |  |
| 23 | Fruit juice                             |  |  |  |  |  |  |  |  |  |
| 24 | Flavored milk                           |  |  |  |  |  |  |  |  |  |
|    | <b><u>Miscellaneous</u></b>             |  |  |  |  |  |  |  |  |  |
| 25 | French fries                            |  |  |  |  |  |  |  |  |  |
| 26 | Chocolate                               |  |  |  |  |  |  |  |  |  |
| 27 | Candy                                   |  |  |  |  |  |  |  |  |  |
| 28 | Cotton candy                            |  |  |  |  |  |  |  |  |  |
| 29 | Chewing gum (not the sugar-free one)    |  |  |  |  |  |  |  |  |  |
| 30 | Lollipop                                |  |  |  |  |  |  |  |  |  |
| 31 | Jam (for example on bread)              |  |  |  |  |  |  |  |  |  |
| 32 | Honey (for example on bread)            |  |  |  |  |  |  |  |  |  |
| 33 | Chocolate spread (for example on bread) |  |  |  |  |  |  |  |  |  |
| 34 | Chips                                   |  |  |  |  |  |  |  |  |  |

## **Section F: Physical and oral examination**

*(taken of the child)*

| S. No | Measurement    | Finding |
|-------|----------------|---------|
| 19.   | Height (in cm) |         |
| 20.   | Weight (in kg) |         |

### S. No 21 **Oral hygiene status assessment**

Debris Index Simplified:

|       | Right permanent first molar                                                         |                                                                                     | Permanent central incisor |                                                                                     | Left permanent first molar                                                          |                                                                                      | Total  |                                                                                       |
|-------|-------------------------------------------------------------------------------------|-------------------------------------------------------------------------------------|---------------------------|-------------------------------------------------------------------------------------|-------------------------------------------------------------------------------------|--------------------------------------------------------------------------------------|--------|---------------------------------------------------------------------------------------|
|       | Buccal                                                                              | Lingual                                                                             | Buccal                    | Lingual                                                                             | Buccal                                                                              | Lingual                                                                              | Buccal | Lingual                                                                               |
| Upper | _____                                                                               | 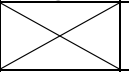 | _____<br>(right)          |  | _____                                                                               |  | _____  |  |
| Lower |  | _____                                                                               | _____<br>(left)           |  |  | _____                                                                                | _____  | _____                                                                                 |

Debris Index Simplified= (The buccal scores) + (The lingual scores)/ (Total number of examined buccal and lingual surfaces)

= \_\_\_\_\_

Calculus Index Simplified:

|       | Right permanent first molar |         | Permanent central incisor |         | Left permanent first molar |         | Total  |         |
|-------|-----------------------------|---------|---------------------------|---------|----------------------------|---------|--------|---------|
|       | Buccal                      | Lingual | Buccal                    | Lingual | Buccal                     | Lingual | Buccal | Lingual |
| Upper | _____                       |         | _____ (right)             |         | _____                      |         | _____  |         |
| Lower |                             | _____   | (left)                    |         |                            | _____   | _____  | _____   |

Calculus Index Simplified = (The buccal scores) + (The lingual scores)/ (Total number of examined buccal and lingual surfaces)

= \_\_\_\_\_

Simplified Oral Hygiene Index= Debris Index Simplified + Calculus Index Simplified= \_\_\_\_\_

S. No 22 **Carious assessment of the permanent first molars and adjacent teeth**

DMFT/dmft index:

| Permanent teeth |  |  |  |  |  | Primary teeth |  |  |  |  |  |
|-----------------|--|--|--|--|--|---------------|--|--|--|--|--|
| D= Decayed      |  |  |  |  |  | d= decayed    |  |  |  |  |  |
| M= Missing      |  |  |  |  |  | m= missing    |  |  |  |  |  |
| F= Filled       |  |  |  |  |  | f= filling    |  |  |  |  |  |

***Maxilla***

|    |    |           |    |    |    |    |    |    |    |    |    |    |           |    |    |
|----|----|-----------|----|----|----|----|----|----|----|----|----|----|-----------|----|----|
| 28 | 27 | <b>26</b> | 25 | 24 | 23 | 22 | 21 | 11 | 12 | 13 | 14 | 15 | <b>16</b> | 17 | 18 |
|----|----|-----------|----|----|----|----|----|----|----|----|----|----|-----------|----|----|

|    |    |    |    |    |    |    |    |    |    |
|----|----|----|----|----|----|----|----|----|----|
| 65 | 64 | 63 | 62 | 61 | 51 | 52 | 53 | 54 | 55 |
|----|----|----|----|----|----|----|----|----|----|

***Mandible***

|    |    |    |    |    |    |    |    |    |    |    |    |    |    |    |    |
|----|----|----|----|----|----|----|----|----|----|----|----|----|----|----|----|
| 38 | 37 | 36 | 35 | 34 | 33 | 32 | 31 | 41 | 42 | 43 | 44 | 45 | 46 | 47 | 48 |
|    |    |    |    |    |    |    |    |    |    |    |    |    |    |    |    |

  

|    |    |    |    |    |    |    |    |    |    |
|----|----|----|----|----|----|----|----|----|----|
| 75 | 74 | 73 | 72 | 71 | 81 | 82 | 83 | 84 | 85 |
|    |    |    |    |    |    |    |    |    |    |

**Permanent first molar:**

Total Decayed=\_\_\_\_\_ Total Missing=\_\_\_\_\_ Total Filled=\_\_\_\_\_

Total DMFT index score=\_\_\_\_\_

**Adjacent teeth:**

Total Decayed=\_\_\_\_\_ Total Missing=\_\_\_\_\_ Total Filled=\_\_\_\_\_

Total DMFT index score=\_\_\_\_\_

Total decayed=\_\_\_\_\_ Total missing=\_\_\_\_\_ Total filled=\_\_\_\_\_

Total dmft index score=\_\_\_\_\_

**Section F: Laboratory-related information**

| S. No | Blood parameter                  | Code | Finding |
|-------|----------------------------------|------|---------|
| 23.   | Hemoglobin (g/dL)                |      |         |
| 24.   | Ferritin (microgram/L)           |      |         |
| 25.   | C-reactive protein (milligram/L) |      |         |

Form filled by: \_\_\_\_\_ Date: \_\_/\_\_/\_\_\_\_ (Day/Month/Year)

Form checked and edited by: \_\_\_\_\_ Date: \_\_/\_\_/\_\_\_\_ (Day/Month/Year)
